# Supplementary material
Source: PubMed Central journal article supplement (PMC5983404)
Supplement: 10.1194_M077503_jlr.M077503-2.pdf [file 10.1194_M077503_jlr.M077503-2.pdf]

## Supplementary Video

Monolayers of human coronary artery endothelial cells (HCAECs) were plated in the setting of a wound healing assay, and cell migration was monitored using Cell-IQ system for 30-min interval for up to 10 h. The 10-hour recordings are played back 3600-times faster. The 3 videos are playbacks of the actual migrations of HCAECs under the conditions shown in the right-hand panel of Figure 7C, i.e. in the presence of Endothelial Cell Basal Medium alone (no addition; left), in the presence of 50  $\mu\text{g/ml}$  of chymase-treated apoA-I (middle) or 50  $\mu\text{g/ml}$  of intact apoA-I (right).
